# Supplementary material for: Speaking up about care concerns in the ICU: patient and family experiences, attitudes and perceived barriers
Source: PubMed Central journal article supplement — BMJ Qual Saf. 2018 Jul 12;27(11):928–36. doi: 10.1136/bmjqs-2017-007525 (PMC6225795; doi:10.1136/bmjqs-2017-007525), 2018-07-12
Supplement: bmjqs-2017-007525supp001.pdf [file bmjqs-2017-007525supp001.pdf]

**Supplemental Digital Content**

“Speaking Up about Care Concerns in the ICU: Patient and Family Experiences, Attitudes, and Perceived Barriers”

**Appendix A. Survey Instrument**

Appendix A. Relevant Portions of Survey Instrument\*

|                                                                                                                                                                                                               | Very uncomfortable        | Somewhat uncomfortable | Somewhat comfortable    | Very comfortable |                          |
|---------------------------------------------------------------------------------------------------------------------------------------------------------------------------------------------------------------|---------------------------|------------------------|-------------------------|------------------|--------------------------|
| <p><b>How comfortable would you be asking a member of the medical team:</b></p> <p>To review with you the name, dose, or reason for medications when they are administered (to be sure they are correct)?</p> |                           |                        |                         |                  |                          |
| Whether he/she has cleaned his/her hands?                                                                                                                                                                     |                           |                        |                         |                  |                          |
| For a meeting with the health care team to review your loved one’s health status?                                                                                                                             |                           |                        |                         |                  |                          |
| About concerns you may have regarding your loved one’s medical care?                                                                                                                                          |                           |                        |                         |                  |                          |
| To discuss a disagreement where you want less aggressive medical care than the team is proposing?                                                                                                             |                           |                        |                         |                  |                          |
| To discuss a disagreement where you want more aggressive medical care than the team is proposing?                                                                                                             |                           |                        |                         |                  |                          |
| About a possible mistake in your loved one’s medical care?                                                                                                                                                    |                           |                        |                         |                  |                          |
| To clarify if he/she gives you confusing information?                                                                                                                                                         |                           |                        |                         |                  |                          |
|                                                                                                                                                                                                               | 1<br>Not confident at all | 2                      | 3<br>Somewhat confident | 4                | 5<br>Extremely confident |
| How confident are you in your ability to get a doctor to listen to what you have to say?                                                                                                                      |                           |                        |                         |                  |                          |

### Supplemental Digital Content

“Speaking Up about Care Concerns in the ICU: Patient and Family Experiences, Attitudes, and Perceived Barriers”

|                                                                                                                                                                                                                                                                                              |                                            |                                      |                                     |                                                                 |                                      |                                                                            |
|----------------------------------------------------------------------------------------------------------------------------------------------------------------------------------------------------------------------------------------------------------------------------------------------|--------------------------------------------|--------------------------------------|-------------------------------------|-----------------------------------------------------------------|--------------------------------------|----------------------------------------------------------------------------|
| How confident are you in your ability to know what questions to ask a doctor?                                                                                                                                                                                                                |                                            |                                      |                                     |                                                                 |                                      |                                                                            |
| How confident are you in your ability to get a doctor to answer all of your questions?                                                                                                                                                                                                       |                                            |                                      |                                     |                                                                 |                                      |                                                                            |
| What is your age?                                                                                                                                                                                                                                                                            |                                            |                                      |                                     |                                                                 |                                      |                                                                            |
| What gender do you identify yourself as?                                                                                                                                                                                                                                                     | Male                                       |                                      |                                     | Female                                                          |                                      |                                                                            |
| What is your ethnicity?                                                                                                                                                                                                                                                                      | White/<br>Caucasian                        | Black/African<br>American            | Latino/<br>Hispanic                 | Asian                                                           | Other                                |                                                                            |
| If Other:                                                                                                                                                                                                                                                                                    | <i>[free text]</i>                         |                                      |                                     |                                                                 |                                      |                                                                            |
| What is the highest grade of school you have completed, or the highest degree you have received?                                                                                                                                                                                             | No schooling completed or less than 1 year | High school graduate (or equivalent) | Some college (1-4 years, no degree) | Associate’s degree (including occupational or academic degrees) | Bachelor’s degree (BA, BS, AB, etc.) | Master’s, Doctorate or other professional degrees (MA, MD, DDS, PhD, etc.) |
| Do you work in healthcare?                                                                                                                                                                                                                                                                   | Yes                                        |                                      |                                     | No                                                              |                                      |                                                                            |
| Do you have any close friends or family who work in healthcare?                                                                                                                                                                                                                              | Yes                                        |                                      |                                     | No                                                              |                                      |                                                                            |
| *These are the questions answered by cohort C (current ICU family members). Question wording differed slightly for cohorts A and B to either reflect the past nature of their ICU experience (cohort A) or to make the question hypothetical, given their lack of ICU experience (cohort B). |                                            |                                      |                                     |                                                                 |                                      |                                                                            |

### Supplemental Methods

For the Principal Component Analysis (PCA), PROC FACTOR was used in SAS 9.3. The principal axis method was used for initial extraction, with the program retaining any component whose eigenvalue was 1.00 or larger. An item was considered to load on a given component if the factor loading was greater than or equal to 0.35. Visual inspection of a scree plot was also conducted to see where components with relatively large eigenvalues separated from those

### Supplemental Digital Content

“Speaking Up about Care Concerns in the ICU: Patient and Family Experiences, Attitudes, and Perceived Barriers”

with smaller eigenvalues. Components appearing before the break are assumed to be meaningful.<sup>3</sup>

### Supplemental Results

As shown in Appendix B below, all 8 Speaking Up items loaded on the first component. The scree plot (not shown) displayed a large break after the first component, indicating that only the first component was meaningful.

#### Appendix B. Factor loadings on first principal component for the 8 Speaking Up items

| Variable             | Factor Loading |
|----------------------|----------------|
| Medication review    | 0.66           |
| Hand hygiene         | 0.62           |
| Meeting request      | 0.78           |
| Concerns             | 0.78           |
| Less aggressive care | 0.81           |
| More aggressive care | 0.80           |
| Mistake              | 0.77           |
| Clarification        | 0.72           |

#### Appendix C. Regression analysis of Speaking Up score<sup>1</sup>

| Parameter                        | $\beta$ | Std. Error <sup>2</sup> | 95% Confidence Interval | P        |
|----------------------------------|---------|-------------------------|-------------------------|----------|
| Intercept                        | 26.03   | 0.77                    | 24.52 – 27.54           | <0.00005 |
| Age (per year)                   | 0.03    | 0.009                   | 0.004 – 0.04            | 0.004    |
| Sex (female vs. male)            | 0.58    | 0.28                    | 0.04 – 1.13             | 0.04     |
| Education                        | -0.46   | 0.17                    | -0.79 – -0.13           | 0.006    |
| Works in healthcare (yes vs. no) | 1.09    | 0.49                    | 0.15 – 2.04             | 0.02     |

<sup>1</sup>Adjusted R<sup>2</sup>=0.02

<sup>2</sup>Huber-White estimates

## Supplemental Digital Content

“Speaking Up about Care Concerns in the ICU: Patient and Family Experiences, Attitudes, and Perceived Barriers”

### Appendix D. Mean Speaking Up score by subgroup

| Participant Group        | n    | Mean Speaking Up Score (SD) |
|--------------------------|------|-----------------------------|
| <b>Sex</b>               |      |                             |
| Males                    | 360  | 26.8 (4.3)                  |
| Females                  | 785  | 27.5 (4.4)                  |
| <b>Healthcare Worker</b> |      |                             |
| Yes                      | 87   | 28.2 (4.3)                  |
| No                       | 1055 | 27.2 (4.4)                  |
| <b>Age (years)</b>       |      |                             |
| 18-29                    | 163  | 26.7 (4.1)                  |
| 30-49                    | 413  | 27.3 (4.5)                  |
| 50-69                    | 517  | 27.5 (4.2)                  |
| 70-89                    | 45   | 28.0 (4.2)                  |
